# Supplementary material
Source: MDPI journal article supplement (https://www.mdpi.com/1424-8247/16/12/1672)
Supplement: s1 [file s1]

## Supplementary Materials:

**Table S1.** The difference in the P value of the left tumor volume between the groups on day 12.

|           | Sham | 5W           | 10W   | Sham+PD-1    | 5W+PD-1      | 10W+PD-1         |
|-----------|------|--------------|-------|--------------|--------------|------------------|
| Sham      | 1    | <b>0.035</b> | 0.278 | <b>0.005</b> | <b>0.031</b> | <b>&lt;0.001</b> |
| 5W        | -    | 1            | 0.399 | <b>0.001</b> | <b>0.002</b> | <b>&lt;0.001</b> |
| 10W       | -    | -            | 1     | <b>0.015</b> | <b>0.020</b> | <b>0.002</b>     |
| Sham+PD-1 | -    | -            | -     | 1            | 0.867        | <b>0.037</b>     |
| 5W+PD-1   | -    | -            | -     | -            | 1            | 0.350            |
| 10W+PD-1  | -    | -            | -     | -            | -            | 1                |

Statistically significant results are shown in bold, with “-” indicating coincidence with the corresponding group.

**Table S2.** Recent pre-clinical trial about the combination of ablation and immunomodulation

| Author                                              | Species | Complete ablation | Ablation modality | Power         | Immunomodulator      | Results                                                                                                                                     |
|-----------------------------------------------------|---------|-------------------|-------------------|---------------|----------------------|---------------------------------------------------------------------------------------------------------------------------------------------|
| Zhong et al.<br>(doi:10.1080/02656736.2020.1836406) | Mouse   | Yes               | MWA               | 5 w for 3 min | DCs injection        | Enhance CTLs activities, decrease Treg number, reduce IL-10 production, induce INF- $\mu$ , inhibit the growth of distant tumor.            |
| Huang et al.(doi:10.1080/02656736.2022.2032406)     | Mouse   | Yes               | MWA               | 5 w for 3 min | Anti-PD-1 antibody   | Enhance survival, inhibit growth of distant tumor, induced tumor-specific immune response, increase Th1 response, resist tumor rechallenge. |
| Duan et al.(10.1080)                                | Mouse   | Yes               | MWA               | 5 w for 3 min | Anti-PD-1 antibody/a | Increase survival, resist tumor rechallenge,                                                                                                |

|                                               |       |                                               |         |                                    |                          |                                                                                                                                           |
|-----------------------------------------------|-------|-----------------------------------------------|---------|------------------------------------|--------------------------|-------------------------------------------------------------------------------------------------------------------------------------------|
| /15384101.2020.1853942)                       |       |                                               |         |                                    | nti-CTLA4 body           | enhance CTLs activities,increase Th1 response.                                                                                            |
| Sun et al. (doi:10.1016/j.biopha.2023.115351) | Mouse | iRFA (70 % necrosis and 30 % residual tumors) | RFA     | 70°C for 2 min                     | OK-432/antiPD-1 antibody | Enhance CTLs activites, decrease Treg in residual tumor, increase survival, inhibit growth of residual tumor, resist tumor rechallenge.   |
| Tan et al(doi:10.1016/j.apsb.2022.08.006)     | Mouse | Yes                                           | CRA/MWA | 2 freezing cycles /10 w for 30-60s | Anti-PD-1 antibody       | CRA showed superior curative effect than MWA local tumor combining with anti-PD-L1 antibody by strengthening CTL/NK cell immune response. |

DCs: dendritic cells; CTLs: cytotoxic T lymphocytes; Th1: type-1 helper T cells; RF: radiofrequency; CpG-oligodeoxynucleotides; Treg: regulatory T cells; CTLA-4: cytotoxic Tlymphocyte associated protein 4; PD-1: programmed cell death 1; iRFA: incomplete RFA; CRA: cryoablation.
